# Supplementary material for: Granulomatous-Lymphocytic Interstitial Lung Disease in Common Variable Immunodeficiency—Features of CT and 18F-FDG Positron Emission Tomography/CT in Clinically Progressive Disease
Source: PubMed Central journal article supplement (PMC7874137; doi:10.3389/fimmu.2020.617985), 2021-01-26
Supplement: DataSheet_1.pdf [file DataSheet_1.pdf]

# Granulomatous-lymphocytic interstitial lung disease in common variable immunodeficiency – features of CT and 18-FDG PET/CT in clinically progressive disease

## Supplementary figures

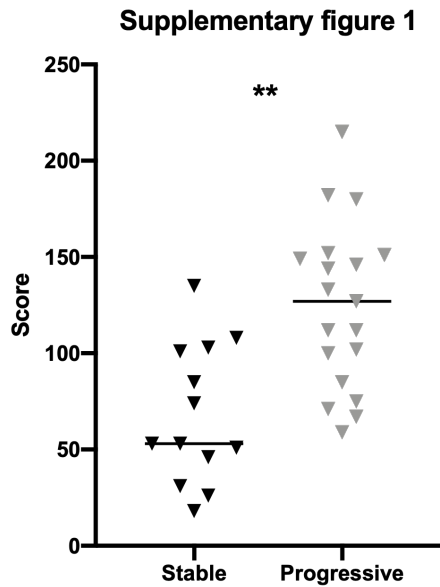

**Supplementary figure legend 1.** Scatter plot of overall radiologic score in patients with stable and progressive disease. \*\*p<0.01

## Supplementary figure 2

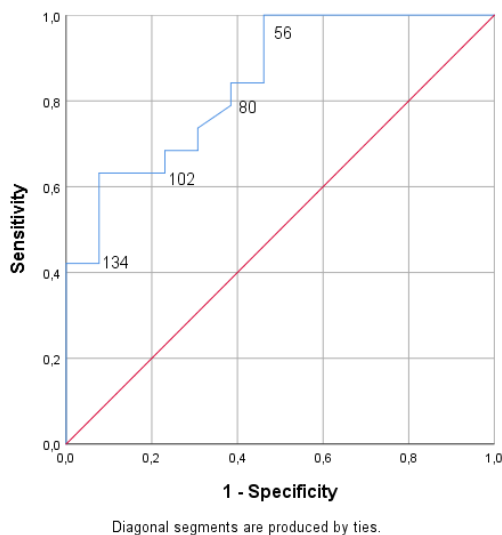

**Supplementary figure legend 2.** ROC analyses – all radiologic features vs progressive/stable disease. ROC analyses show good performance of the overall radiologic scoring in predicting progressive vs stable disease (AUC 0.844). A score above 63 was accompanied with a 94.7% sensitivity and 46.2% specificity for progressive disease. A score above 140 was accompanied with 42.1 % sensitivity and 100% specificity for progressive disease in our cohort. ROC

analysis performed using IBS SPSS version 25 software with clinical status as state variable and overall radiologic score as test variable.

### Area Under the Curve

Test Result Variable(s): All\_score\_num

| Area | Std. Error <sup>a</sup> | Asymptotic Sig. <sup>b</sup> | Asymptotic 95% Confidence Interval |             |
|------|-------------------------|------------------------------|------------------------------------|-------------|
|      |                         |                              | Lower Bound                        | Upper Bound |
| ,844 | ,069                    | ,001                         | ,709                               | ,979        |

The test result variable(s): All\_score\_num has at least one tie between the positive actual state group and the negative actual state group. Statistics may be biased.

a. Under the nonparametric assumption

b. Null hypothesis: true area = 0.5

### Coordinates of the Curve

Test Result Variable(s): All\_score\_num

| Positive if Greater Than or Equal To <sup>a</sup> | Sensitivity | 1 - Specificity |
|---------------------------------------------------|-------------|-----------------|
| 17,0000                                           | 1,000       | 1,000           |
| 22,0000                                           | 1,000       | ,923            |
| 28,5000                                           | 1,000       | ,846            |
| 38,5000                                           | 1,000       | ,769            |
| 48,5000                                           | 1,000       | ,692            |
| 52,0000                                           | 1,000       | ,615            |
| 56,0000                                           | 1,000       | ,462            |
| 63,0000                                           | ,947        | ,462            |
| 69,0000                                           | ,895        | ,462            |
| 72,5000                                           | ,842        | ,462            |
| 74,5000                                           | ,842        | ,385            |
| 80,0000                                           | ,789        | ,385            |
| 92,5000                                           | ,737        | ,308            |
| 100,5000                                          | ,684        | ,308            |
| 101,5000                                          | ,684        | ,231            |
| 102,5000                                          | ,632        | ,231            |
| 105,5000                                          | ,632        | ,154            |
| 110,0000                                          | ,632        | ,077            |
| 119,5000                                          | ,526        | ,077            |
| 130,0000                                          | ,474        | ,077            |

### Coordinates of the Curve (cont.)

| Positive if Greater Than or Equal To <sup>a</sup> | Sensitivity | 1 - Specificity |
|---------------------------------------------------|-------------|-----------------|
| 134,0000                                          | ,421        | ,077            |
| 139,5000                                          | ,421        | ,000            |
| 145,0000                                          | ,368        | ,000            |
| 147,5000                                          | ,316        | ,000            |
| 150,0000                                          | ,263        | ,000            |
| 151,5000                                          | ,211        | ,000            |
| 166,0000                                          | ,158        | ,000            |
| 181,0000                                          | ,105        | ,000            |
| 198,5000                                          | ,053        | ,000            |
| 216,0000                                          | ,000        | ,000            |

The test result variable(s): All\_score\_num has at least one tie between the positive actual state group and the negative actual state group.

- a. The smallest cutoff value is the minimum observed test value minus 1, and the largest cutoff value is the maximum observed test value plus 1. All the other cutoff values are the average of two consecutive ordered observed test values

### Supplementary figure 3

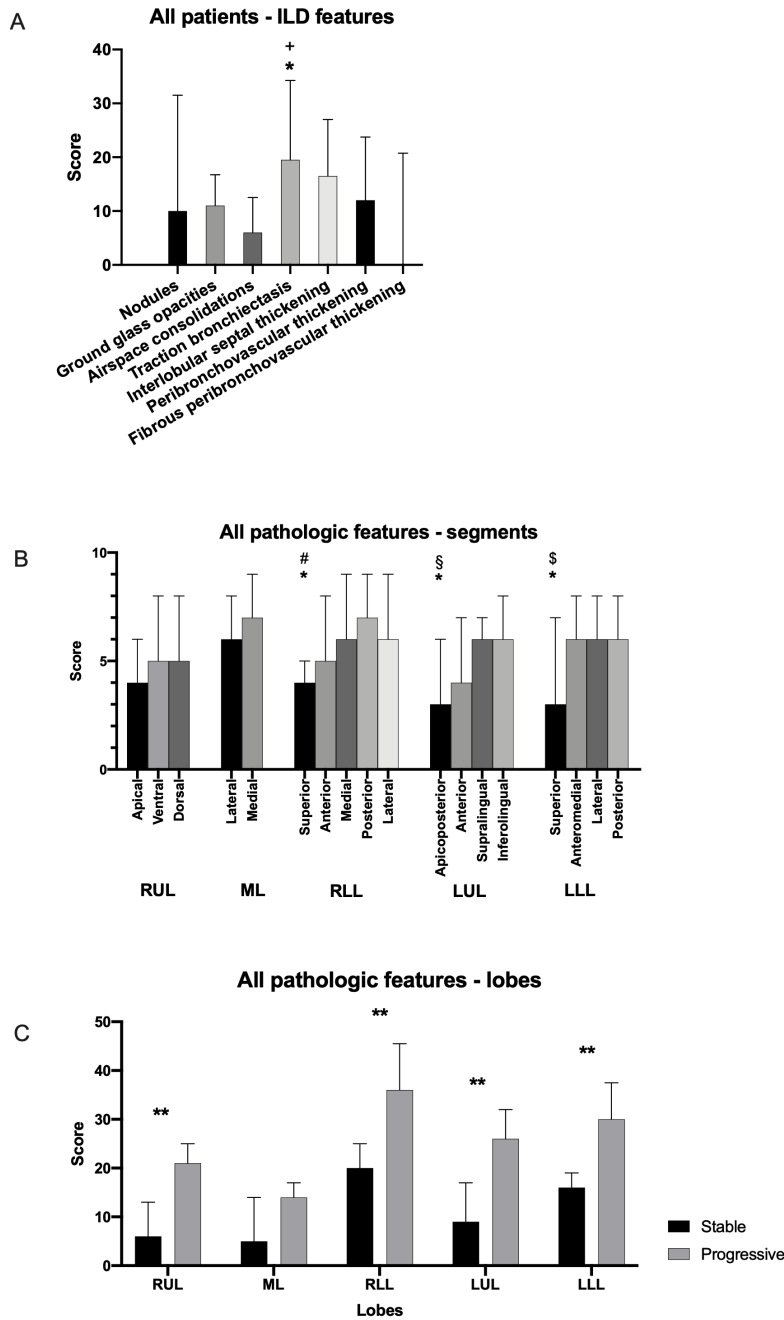

**Supplementary figure legend 3 (patients without monogenic defects).** Pathologic features on pulmonary CT scans in GLILD patients. Overall score for specific features in all patients (A). Overall score of pathologic features in all pulmonary segments for all patients (B). Overall score of pathological features in single lobes in patients with stable and progressive disease (C). RUL=right upper lobe. ML=middle lobe. RLL=right lower lobe. LUL=left upper lobe. LLL=left lower lobe. Median and interquartile range. \* $p < 0.05$ . \*\* $p < 0.01$ . + traction bronchiectasis vs ground glass opacities, nodules, consolidations, fibro-/peribronchovascular thickening. # superior vs lateral. § apicoposterior vs inferolingual. \$ superior vs posterior.

### Supplementary figure 4

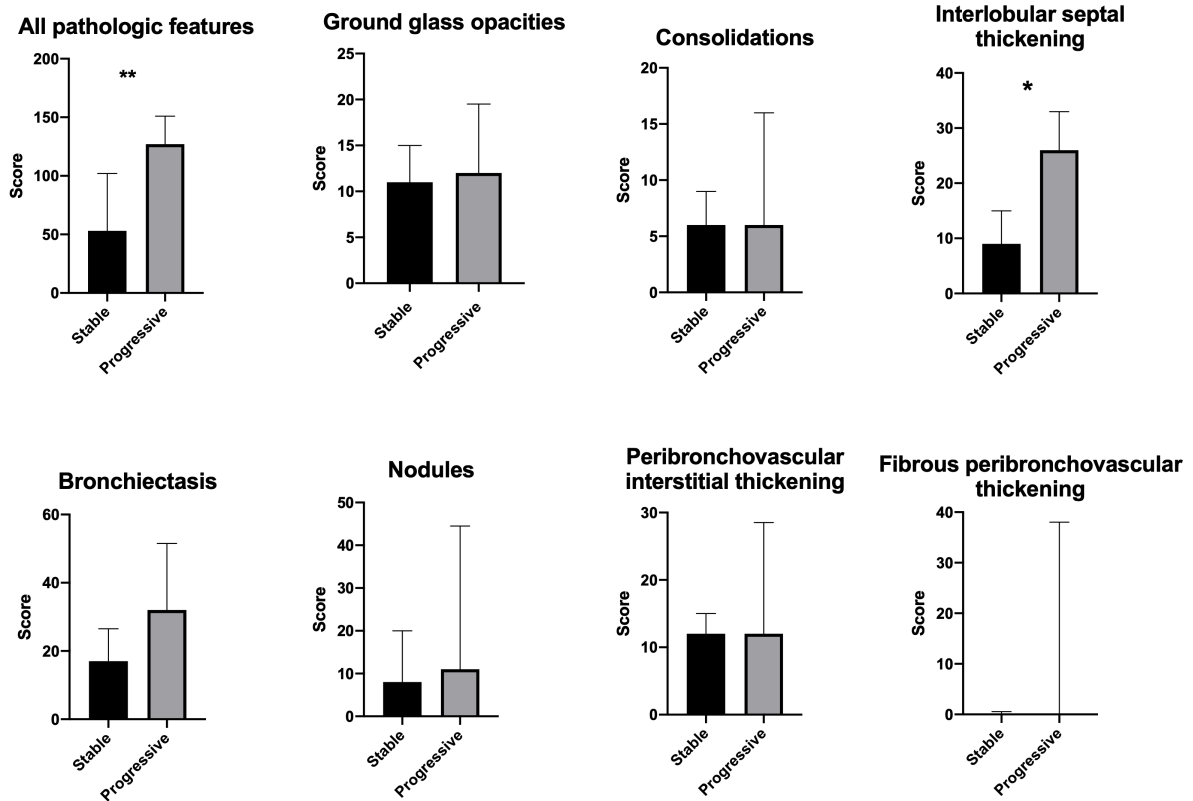

**Supplementary figure legend 4 (patients without monogenic defects).** Pulmonary CT scans of patients with stable and progressive disease with score of all pathological features combined and score of specific features. Median and interquartile range. \*p<0.05. \*\*p<0.01.

Supplementary figure 5

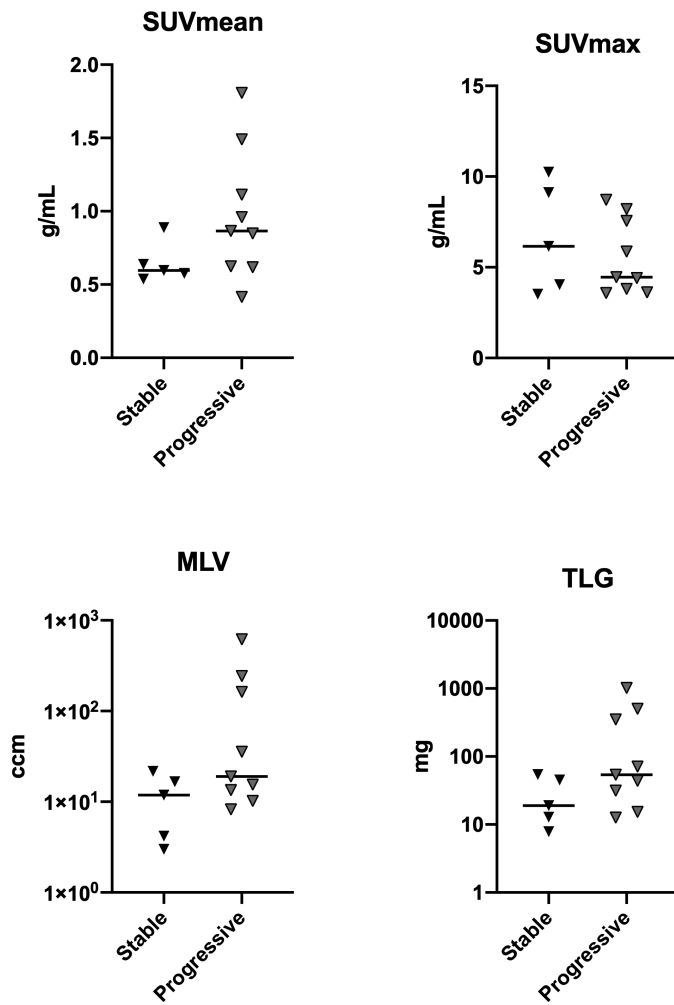

**Supplementary figure legend 5 (patients without monogenic defects).** FDG PET-CT in patients with stable and progressive disease as evaluated by SUVmean, SUVmax, MLV and TLG (n=17)

**Supplementary figure 6**

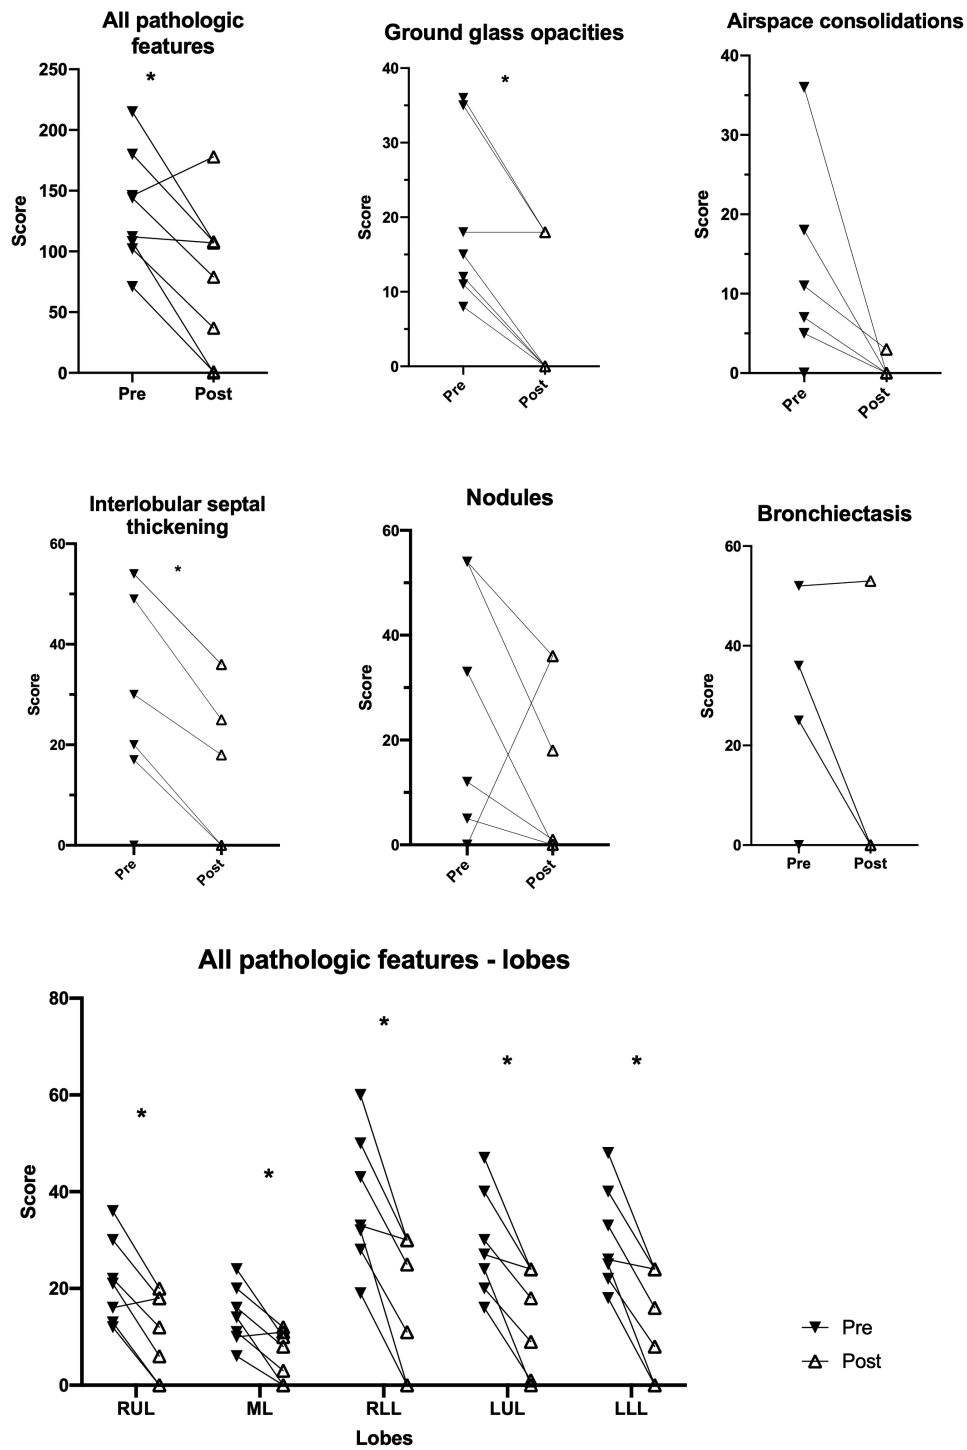

**Supplementary figure legend 6 (patients without monogenic defects.** Change in pathological features on pulmonary CT scans in GLILD patients before and after treatment with rituximab. RUL=right upper lobe. ML=middle lobe. RLL=right lower lobe. LUL=left upper lobe. LLL=left lower lobe. \*p<0.05.
